# Supplementary material for: High-LET Carbon and Iron Ions Elicit a Prolonged and Amplified p53 Signaling and Inflammatory Response Compared to low-LET X-Rays in Human Peripheral Blood Mononuclear Cells
Source: Front Oncol. 2021 Nov 23;11:768493. doi: 10.3389/fonc.2021.768493 (PMC8649625; doi:10.3389/fonc.2021.768493)
Supplement: Supplementary file 5 [file Table_4.xlsx]

## Sheet: Iron FDR 0.05 no FC
Transcript ID	gene_assignment	Gene Symbol	RefSeq	p-value(Dose)	FDR-corrected (p-value(Dose))	p-value(Donor)	FDR-corrected (p-value(Donor))	p-value(0.25 Gy vs. 0 Gy)	FDR-corrected (p-value(0.25 Gy vs. 0 Gy))	Ratio(0.25 Gy vs. 0 Gy)	Fold-Change(0.25 Gy vs. 0 Gy)	Fold-Change(0.25 Gy vs. 0 Gy) (Description)	p-value(1 Gy vs. 0 Gy)	FDR-corrected (p-value(1 Gy vs. 0 Gy))	Ratio(1 Gy vs. 0 Gy)	Fold-Change(1 Gy vs. 0 Gy)	Fold-Change(1 Gy vs. 0 Gy) (Description)	F-statistic(Dose)	Sum of squares (Dose)	F-statistic (Donor)	Sum of squares (Donor)	Sum of squares (Error)	F-statistic (Error)
8173299	AF298812 // EDA2R // ectodysplasin A2 receptor // Xq12 // 60401 /// AK296264 // EDA2R /	EDA2R	AF298812	8.7955e-08	0.00292864	0.0820959	0.216707	5.29299e-07	0.0176241	2.41187	2.41187	0.25 Gy up vs 0 Gy	2.89885e-08	0.00096523	4.19258	4.19258	1 Gy up vs 0 Gy	671.581	8.70072	3.67366	0.0713917	0.0388667	1
7934906	AK300664 // ACTA2 // actin, alpha 2, smooth muscle, aorta // 10q23.3 // 59 /// AY692464	ACTA2	AK300664	5.27579e-07	0.0087834	1.29299e-06	0.000406499	2.3852e-06	0.03971	1.72218	1.72218	0.25 Gy up vs 0 Gy	1.79921e-07	0.00299541	2.3175	2.3175	1 Gy up vs 0 Gy	368.272	3.0251	236.062	2.90863	0.0246429	1
8085486	ENST00000285021 // XPC // xeroderma pigmentosum, complementation group C // 3p25 // 750	XPC	ENST00000285021	9.76747e-07	0.0108409	0.00155093	0.0167233	4.08285e-06	0.0453156	1.6047	1.6047	0.25 Gy up vs 0 Gy	3.36863e-07	0.00373884	2.05654	2.05654	1 Gy up vs 0 Gy	299.362	2.23426	20.1686	0.225789	0.0223902	1
7939738	AB107037 // DDB2 // damage-specific DNA binding protein 2, 48kDa // 11p12-p11 // 1643 /	DDB2	AB107037	2.13137e-06	0.017742	0.00859589	0.0498202	7.81389e-06	0.0520358	2.2087	2.2087	0.25 Gy up vs 0 Gy	7.50653e-07	0.00624863	3.25171	3.25171	1 Gy up vs 0 Gy	230.114	6.01645	10.4041	0.40803	0.0784366	1
8149733	AF012535 // TNFRSF10B // tumor necrosis factor receptor superfamily, member 10b // 8p22	TNFRSF10B	AF012535	5.44733e-06	0.0324608	0.0962184	0.239984	2.38418e-05	0.0739941	1.9607	1.9607	0.25 Gy up vs 0 Gy	1.86314e-06	0.010574	2.83204	2.83204	1 Gy up vs 0 Gy	167.501	4.64065	3.36207	0.13972	0.0831158	1
7985767	AK022624 // AEN // apoptosis enhancing nuclease // 15q26.1 // 64782 /// BC005164 // AEN	AEN	AK022624	5.99483e-06	0.0324608	0.0285596	0.109292	2.13111e-05	0.0739941	2.03085	2.03085	0.25 Gy up vs 0 Gy	2.12014e-06	0.010574	2.86061	2.86061	1 Gy up vs 0 Gy	162.144	4.78422	6.21176	0.274927	0.088518	1
7985777	U88964 // ISG20 // interferon stimulated exonuclease gene 20kDa // 15q26 // 3669 /// EN	ISG20	U88964	8.25936e-06	0.0324608	0.000303532	0.00648696	0.028971	0.558936	0.952824	-1.04951	0.25 Gy down vs 0 Gy	3.80242e-06	0.010574	0.762944	-1.31071	1 Gy down vs 0 Gy	145.413	0.346719	36.3757	0.1301	0.0071531	1
8092230	AF355465 // ZMAT3 // zinc finger, matrin-type 3 // 3q26.32 // 64393 /// BC002896 // ZMA	ZMAT3	AF355465	8.88963e-06	0.0324608	0.00095863	0.012651	0.000136149	0.197313	1.38688	1.38688	0.25 Gy up vs 0 Gy	2.80108e-06	0.010574	1.89767	1.89767	1 Gy up vs 0 Gy	141.819	1.70864	24.0717	0.435024	0.0361441	1
7941694	AF080561 // RBM14 // RNA binding motif protein 14 // 11q13.2 // 10432 /// AF315632 // R	RBM14	AF080561	9.37936e-06	0.0324608	0.0144723	0.0699293	0.00130265	0.352638	1.08646	1.08646	0.25 Gy up vs 0 Gy	3.24274e-06	0.010574	1.27191	1.27191	1 Gy up vs 0 Gy	139.254	0.24855	8.37931	0.022434	0.00535462	1
7967586	---	RPL22P19	---	1.06092e-05	0.0324608	0.000704688	0.0106413	2.44447e-05	0.0739941	1.28207	1.28207	0.25 Gy up vs 0 Gy	4.13652e-06	0.010574	1.40072	1.40072	1 Gy up vs 0 Gy	133.53	0.508224	26.9171	0.153673	0.0114182	1
8120431	AJ420505 // PTP4A1 // protein tyrosine phosphatase type IVA, member 1 // 6q12 // 7803 /	PTP4A1	AJ420505	1.08446e-05	0.0324608	0.0816384	0.216043	2.12124e-05	0.0739941	1.2777	1.2777	0.25 Gy up vs 0 Gy	4.44594e-06	0.010574	1.37759	1.37759	1 Gy up vs 0 Gy	132.535	0.467166	3.68493	0.0194833	0.0105746	1
7990345	AF030698 // SEMA7A // semaphorin 7A, GPI membrane anchor (John Milton Hagen blood group	SEMA7A	AF030698	1.27142e-05	0.0324608	0.000223036	0.00543059	0.00109198	0.351678	1.20291	1.20291	0.25 Gy up vs 0 Gy	4.26416e-06	0.010574	1.63945	1.63945	1 Gy up vs 0 Gy	125.536	1.03898	40.5555	0.503475	0.0248289	1
7960320	AK299203 // DCP1B // DCP1 decapping enzyme homolog B (S. cerevisiae) // 12p13.33 // 196	DCP1B	AK299203	1.33241e-05	0.0324608	0.000171268	0.00467749	0.000517487	0.277915	1.23441	1.23441	0.25 Gy up vs 0 Gy	4.28135e-06	0.010574	1.631	1.631	1 Gy up vs 0 Gy	123.544	1.0026	44.4957	0.541644	0.0243459	1
7956989	AF092845 // MDM2 // Mdm2, p53 E3 ubiquitin protein ligase homolog (mouse) // 12q14.3-q1	MDM2	AF092845	1.36484e-05	0.0324608	0.357133	0.547766	0.000136294	0.197313	1.65786	1.65786	0.25 Gy up vs 0 Gy	4.3462e-06	0.010574	2.5071	2.5071	1 Gy up vs 0 Gy	122.534	3.5284	1.30198	0.0562365	0.0863859	1
8004431	AK293777 // POLR2A // polymerase (RNA) II (DNA directed) polypeptide A, 220kDa // 17p13	POLR2A	AK293777	1.58814e-05	0.0336599	0.0102743	0.0560184	0.00104434	0.351678	1.1124	1.1124	0.25 Gy up vs 0 Gy	5.24913e-06	0.011652	1.31362	1.31362	1 Gy up vs 0 Gy	116.351	0.314717	9.6711	0.039239	0.00811469	1
7942232	AB091316 // NADSYN1 // NAD synthetase 1 // 11q13.4 // 55191 /// BC003638 // NADSYN1 //	NADSYN1	AB091316	1.61744e-05	0.0336599	3.64062e-06	0.000720615	1.76586e-05	0.0739941	1.0911	1.0911	0.25 Gy up vs 0 Gy	8.64025e-06	0.0144388	1.1036	1.1036	1 Gy up vs 0 Gy	115.626	0.04842	166.516	0.104596	0.00125629	1
8109697	BC000196 // CCNG1 // cyclin G1 // 5q32-q34 // 900 /// BC007093 // CCNG1 // cyclin G1 //	CCNG1	BC000196	2.30158e-05	0.0403346	0.00301463	0.0254695	5.62286e-05	0.124816	1.37583	1.37583	0.25 Gy up vs 0 Gy	8.80897e-06	0.0144388	1.55224	1.55224	1 Gy up vs 0 Gy	102.466	0.859426	15.7086	0.197632	0.0251623	1
8119858	AB024313 // POLH // polymerase (DNA directed), eta // 6p21.1 // 5429 /// AF158185 // PO	POLH	AB024313	2.71654e-05	0.040532	0.117977	0.274513	0.000291645	0.271326	1.66502	1.66502	0.25 Gy up vs 0 Gy	8.6382e-06	0.0144388	2.57412	2.57412	1 Gy up vs 0 Gy	96.7966	3.72906	2.98446	0.172463	0.115574	1
8064844	BC000491 // PCNA // proliferating cell nuclear antigen // 20pter-p12 // 5111 /// BC0624	PCNA	BC000491	2.822e-05	0.040532	0.042138	0.140405	0.000302283	0.271326	1.84187	1.84187	0.25 Gy up vs 0 Gy	8.97488e-06	0.0144388	3.10398	3.10398	1 Gy up vs 0 Gy	95.5377	5.35164	5.17341	0.43469	0.168048	1
8128698	AF033122 // SESN1 // sestrin 1 // 6q21 // 27244 /// AK290157 // SESN1 // sestrin 1 // 6	SESN1	AF033122	2.88055e-05	0.040532	0.00527246	0.0364151	0.000117032	0.197313	1.4627	1.4627	0.25 Gy up vs 0 Gy	9.93748e-06	0.0144388	1.79368	1.79368	1 Gy up vs 0 Gy	94.8655	1.46417	12.6501	0.292865	0.0463024	1
8127637	AJ420517 // TMEM30A // transmembrane protein 30A // 6q14.1 // 55754 /// BC009006 // TME	TMEM30A	AJ420517	2.93567e-05	0.040532	0.421732	0.606569	0.000777336	0.336142	1.33305	1.33305	0.25 Gy up vs 0 Gy	9.35264e-06	0.0144388	1.87877	1.87877	1 Gy up vs 0 Gy	94.2491	1.65972	1.0923	0.0288529	0.0528297	1
7912250		MIR34A		3.00727e-05	0.040532	0.000153282	0.0044381	0.00187702	0.381092	1.0632	1.0632	0.25 Gy up vs 0 Gy	9.97364e-06	0.0144388	1.17069	1.17069	1 Gy up vs 0 Gy	93.4711	0.105088	46.2572	0.0780092	0.00337284	1
8008922	AK299773 // PPM1D // protein phosphatase, Mg2+/Mn2+ dependent, 1D // 17q23.2 // 8493 //	PPM1D	AK299773	3.04322e-05	0.040532	0.203298	0.386138	0.000497487	0.277915	1.3002	1.3002	0.25 Gy up vs 0 Gy	9.62369e-06	0.0144388	1.69414	1.69414	1 Gy up vs 0 Gy	93.0897	1.15689	2.08778	0.0389196	0.0372832	1
8073081	CR456395 // APOBEC3F // apolipoprotein B mRNA editing enzyme, catalytic polypeptide-lik	APOBEC3F	CR456395	2.24149e-05	0.0403346	0.000258478	0.00586604	0.0647257	0.62854	1.03348	1.03348	0.25 Gy up vs 0 Gy	1.05638e-05	0.0146559	1.21631	1.21631	1 Gy up vs 0 Gy	103.4	0.183069	38.5015	0.10225	0.00531146	1
8088247		ARHGEF3		3.9079e-05	0.0481931	2.49054e-05	0.00173095	0.000232686	0.249927	1.20125	1.20125	0.25 Gy up vs 0 Gy	1.28725e-05	0.0166275	1.35637	1.35637	1 Gy up vs 0 Gy	85.4043	0.392083	86.6501	0.596703	0.0137727	1
8151890	AF409115 // TP53INP1 // tumor protein p53 inducible nuclear protein 1 // 8q22 // 94241	TP53INP1	AF409115	4.09966e-05	0.0487522	0.339997	0.532609	0.000591005	0.29069	1.36037	1.36037	0.25 Gy up vs 0 Gy	1.29836e-05	0.0166275	1.83342	1.83342	1 Gy up vs 0 Gy	84.0039	1.52974	1.36572	0.0373053	0.0546311	1
8000329	NM_024675 // PALB2 // partner and localizer of BRCA2 // 16p12.2 // 79728	PALB2	NM_024675	5.10758e-05	0.0515301	1.62458e-05	0.00139777	0.00123594	0.351678	1.08015	1.08015	0.25 Gy up vs 0 Gy	1.62938e-05	0.0200939	1.18289	1.18289	1 Gy up vs 0 Gy	77.8567	0.117698	100.258	0.227344	0.00453519	1
8112202	AK297298 // PLK2 // polo-like kinase 2 // 5q12.1-q13.2 // 10769 /// BC013879 // PLK2 //	PLK2	AK297298	4.97033e-05	0.0515301	0.0289294	0.110049	0.00550076	0.450793	1.24843	1.24843	0.25 Gy up vs 0 Gy	1.73032e-05	0.0205766	1.91	1.91	1 Gy up vs 0 Gy	78.5942	1.80049	6.17525	0.2122	0.0687259	1
8018236	AK298908 // FDXR // ferredoxin reductase // 17q24-q25 // 2232 /// AK301779 // FDXR // f	FDXR	AK298908	5.95521e-05	0.0550807	0.133079	0.295817	0.000453118	0.277915	1.78903	1.78903	0.25 Gy up vs 0 Gy	1.92576e-05	0.0221111	2.77034	2.77034	1 Gy up vs 0 Gy	73.8226	4.3511	2.7726	0.245126	0.17682	1
8076137	AK295787 // SUN2 // Sad1 and UNC84 domain containing 2 // 22q13.1 // 25777 /// AY682988	SUN2	AK295787	5.12212e-05	0.0515301	6.08423e-07	0.00028137	0.0344206	0.570802	0.970836	-1.03004	0.25 Gy down vs 0 Gy	2.12852e-05	0.0228553	0.87872	-1.13802	1 Gy down vs 0 Gy	77.7802	0.0764006	304.141	0.44812	0.00294679	1
7994131	BC036472 // PRKCB // protein kinase C, beta // 16p11.2 // 5579 /// ENST00000321728 // P	PRKCB	BC036472	5.43301e-05	0.0516866	8.57045e-06	0.00102651	0.0272474	0.558496	0.939223	-1.06471	0.25 Gy down vs 0 Gy	2.19124e-05	0.0228553	0.774256	-1.29156	1 Gy down vs 0 Gy	76.209	0.296107	124.614	0.726276	0.0116564	1
8068478	ENST00000481458 // CHAF1B // chromatin assembly factor 1, subunit B (p60) // 21q22.13 /	CHAF1B	ENST00000481458	7.21183e-05	0.0583448	0.00258714	0.0231882	0.0112551	0.506211	1.05428	1.05428	0.25 Gy up vs 0 Gy	2.60834e-05	0.0228553	1.18333	1.18333	1 Gy up vs 0 Gy	69.073	0.123394	16.6492	0.0446139	0.00535928	1
7989493	BC003667 // RPS27L // ribosomal protein S27-like // 15q22.2 // 51065 /// ENST0000033096	RPS27L	BC003667	7.28866e-05	0.0583448	0.194685	0.375538	0.000270915	0.265314	1.67776	1.67776	0.25 Gy up vs 0 Gy	2.54444e-05	0.0228553	2.19501	2.19501	1 Gy up vs 0 Gy	68.8189	2.65879	2.15371	0.124812	0.115904	1
8054254	AK092327 // AFF3 // AF4/FMR2 family, member 3 // 2q11.2-q12 // 3899 /// AK297407 // AFF	AFF3	AK092327	7.30234e-05	0.0583448	0.00117236	0.0141435	0.0049771	0.449934	0.851395	-1.17454	0.25 Gy down vs 0 Gy	2.46707e-05	0.0228553	0.649213	-1.54033	1 Gy down vs 0 Gy	68.774	0.793705	22.3624	0.38712	0.0346223	1
8043945	AF096300 // MAP4K4 // mitogen-activated protein kinase kinase kinase kinase 4 // 2q11.2	MAP4K4	AF096300	7.34869e-05	0.0583448	0.0113718	0.0597988	0.000374255	0.277915	1.28165	1.28165	0.25 Gy up vs 0 Gy	2.45818e-05	0.0228553	1.4953	1.4953	1 Gy up vs 0 Gy	68.6228	0.686063	9.27302	0.139062	0.0299928	1
8157516	BC003154 // TRIM32 // tripartite motif containing 32 // 9q33.1 // 22954 /// U18543 // T	TRIM32	BC003154	7.48681e-05	0.0583448	0.000110944	0.00367711	0.00544258	0.449934	1.09999	1.09999	0.25 Gy up vs 0 Gy	2.5424e-05	0.0228553	1.29623	1.29623	1 Gy up vs 0 Gy	68.1796	0.286807	51.7769	0.32671	0.0126199	1
8007100	AK290810 // IGFBP4 // insulin-like growth factor binding protein 4 // 17q12-q21.1 // 34	IGFBP4	AK290810	7.64527e-05	0.0583448	0.0194826	0.0850102	0.00142241	0.357522	1.16583	1.16583	0.25 Gy up vs 0 Gy	2.43242e-05	0.0228553	1.37785	1.37785	1 Gy up vs 0 Gy	67.6844	0.427919	7.37119	0.069904	0.0189668	1
7899436	BC013304 // SESN2 // sestrin 2 // 1p35.3 // 83667 /// BC033719 // SESN2 // sestrin 2 //	SESN2	BC013304	7.88515e-05	0.0583448	0.0611935	0.179773	0.0026571	0.409599	1.21049	1.21049	0.25 Gy up vs 0 Gy	2.55699e-05	0.0228553	1.56474	1.56474	1 Gy up vs 0 Gy	66.9602	0.840416	4.29448	0.0808498	0.0376529	1
7961983	AB032470 // TM7SF3 // transmembrane 7 superfamily member 3 // 12q11-q12 // 51768 /// BC	TM7SF3	AB032470	9.02866e-05	0.0626307	0.000996685	0.0128878	0.00368446	0.449309	1.12687	1.12687	0.25 Gy up vs 0 Gy	2.96172e-05	0.0246541	1.33879	1.33879	1 Gy up vs 0 Gy	63.8724	0.358239	23.7321	0.199658	0.016826	1
8053406	AK296522 // RETSAT // retinol saturase (all-trans-retinol 13,14-reductase) // 2p11.2 //	RETSAT	AK296522	0.00010522	0.064372	0.00226078	0.0212347	0.00159147	0.368315	1.16801	1.16801	0.25 Gy up vs 0 Gy	3.34836e-05	0.0271928	1.36851	1.36851	1 Gy up vs 0 Gy	60.546	0.409721	17.5193	0.177832	0.0203013	1
8004331	AY646650 // KCTD11 // potassium channel tetramerisation domain containing 11 // 17p13.1	KCTD11	AY646650	7.66232e-05	0.0583448	1.07017e-05	0.00116999	0.130628	0.680571	0.976822	-1.02373	0.25 Gy down vs 0 Gy	3.66459e-05	0.0278979	0.864907	-1.15619	1 Gy down vs 0 Gy	67.632	0.101071	115.562	0.259048	0.0044833	1
8128894	ENST00000358835 // REV3L // REV3-like, polymerase (DNA directed), zeta, catalytic subun	REV3L	ENST00000358835	0.000105506	0.064372	0.0014388	0.0159574	0.0104134	0.495512	1.16667	1.16667	0.25 Gy up vs 0 Gy	3.69871e-05	0.0278979	1.5744	1.5744	1 Gy up vs 0 Gy	60.4886	0.88692	20.737	0.456088	0.0439878	1
8114050	BC001329 // SEPT8 // septin 8 // 5q31 // 23176 /// BC140759 // SEPT8 // septin 8 // 5q3	2008-09-01	BC001329	0.00010633	0.064372	2.06333e-05	0.00158104	0.0151079	0.523189	1.05406	1.05406	0.25 Gy up vs 0 Gy	3.85412e-05	0.0278979	1.18286	1.18286	1 Gy up vs 0 Gy	60.3242	0.122848	92.4055	0.282271	0.00610939	1
7953211	AY425618 // C12orf5 // chromosome 12 open reading frame 5 // 12p13.3 // 57103	C12orf5	AY425618	0.000109825	0.0653008	0.425912	0.610512	0.00248035	0.401572	1.39085	1.39085	0.25 Gy up vs 0 Gy	3.51997e-05	0.0278979	2.05739	2.05739	1 Gy up vs 0 Gy	59.6451	2.17186	1.08012	0.0589957	0.109239	1
7913357	AK304167 // ECE1 // endothelin converting enzyme 1 // 1p36.1 // 1889 /// BC117256 // EC	ECE1	AK304167	0.000130554	0.0735751	0.00164167	0.0173178	0.00459541	0.449934	1.1218	1.1218	0.25 Gy up vs 0 Gy	4.27126e-05	0.0302596	1.31765	1.31765	1 Gy up vs 0 Gy	56.1368	0.31969	19.7473	0.168686	0.0170845	1
7922343	AK297932 // TNFSF4 // tumor necrosis factor (ligand) superfamily, member 4 // 1q25 // 7	TNFSF4	AK297932	0.000145294	0.0767912	0.585161	0.736167	0.00184296	0.378797	1.91209	1.91209	0.25 Gy up vs 0 Gy	4.6343e-05	0.0321476	3.57328	3.57328	1 Gy up vs 0 Gy	54.0653	6.7517	0.700682	0.131252	0.374641	1
7948534	AK303032 // DDB1 // damage-specific DNA binding protein 1, 127kDa // 11q12-q13 // 1642	DDB1	AK303032	0.00013258	0.0735751	0.000108804	0.00367056	0.000316577	0.271326	1.06967	1.06967	0.25 Gy up vs 0 Gy	5.06207e-05	0.0343983	1.09789	1.09789	1 Gy up vs 0 Gy	55.8341	0.0386732	52.1289	0.0541602	0.00207794	1
8030158	L22474 // BAX // BCL2-associated X protein // 19q13.3-q13.4 // 581 /// ENST00000345358	BAX	L22474	0.000136494	0.0745054	0.317806	0.510787	0.000318016	0.271326	1.59116	1.59116	0.25 Gy up vs 0 Gy	5.2444e-05	0.0344233	1.89764	1.89764	1 Gy up vs 0 Gy	55.2663	1.82364	1.45458	0.071996	0.0989922	1
8065569	AK290968 // BCL2L1 // BCL2-like 1 // 20q11.21 // 598 /// AY263335 // BCL2L1 // BCL2-lik	BCL2L1	AK290968	0.000153919	0.0800786	0.00310103	0.0258648	0.0129819	0.514387	1.11966	1.11966	0.25 Gy up vs 0 Gy	5.37589e-05	0.0344233	1.38832	1.38832	1 Gy up vs 0 Gy	52.9789	0.462562	15.54	0.203521	0.0261932	1
7985053	AK026282 // FBXO22 // F-box protein 22 // 15q24.2 // 26263 /// AK223500 // FBXO22 // F-	FBXO22	AK026282	0.000159939	0.0815995	0.00471157	0.0337161	0.00803828	0.470004	1.18858	1.18858	0.25 Gy up vs 0 Gy	5.36795e-05	0.0344233	1.56766	1.56766	1 Gy up vs 0 Gy	52.2675	0.856425	13.2207	0.324939	0.0491563	1
8175288	AF086333 // MOSPD1 // motile sperm domain containing 1 // Xq26.3 // 56180 /// AK299172	MOSPD1	AF086333	0.000169584	0.0830386	0.00365617	0.0286648	0.00105943	0.351678	1.0811	1.0811	0.25 Gy up vs 0 Gy	5.56419e-05	0.0344579	1.14253	1.14253	1 Gy up vs 0 Gy	51.1992	0.0746201	14.5882	0.0318922	0.00437234	1
8163629	BC093630 // TNFSF8 // tumor necrosis factor (ligand) superfamily, member 8 // 9q33 // 9	TNFSF8	BC093630	0.000174411	0.0841647	0.00271221	0.0238407	0.00176366	0.378439	1.66347	1.66347	0.25 Gy up vs 0 Gy	5.58828e-05	0.0344579	2.60977	2.60977	1 Gy up vs 0 Gy	50.6945	3.83525	16.3537	1.85584	0.226963	1
7959123	AK301165 // PRKAB1 // protein kinase, AMP-activated, beta 1 non-catalytic subunit // 12	PRKAB1	AK301165	0.000180654	0.0848398	0.0053668	0.0367541	0.00144781	0.357522	1.25612	1.25612	0.25 Gy up vs 0 Gy	5.83749e-05	0.0353402	1.50742	1.50742	1 Gy up vs 0 Gy	50.0687	0.704011	12.5621	0.264951	0.0421827	1
7902227	BC011757 // GADD45A // growth arrest and DNA-damage-inducible, alpha // 1p31.2 // 1647	GADD45A	BC011757	0.000189791	0.0877706	0.579017	0.731373	0.00215206	0.395769	1.42084	1.42084	0.25 Gy up vs 0 Gy	6.07043e-05	0.0360941	1.97145	1.97145	1 Gy up vs 0 Gy	49.203	1.91868	0.712977	0.041704	0.116986	1
8041763	BC109033 // PRKCE // protein kinase C, epsilon // 2p21 // 5581 /// BC109034 // PRKCE //	PRKCE	BC109033	0.000118378	0.0679593	0.00337562	0.0272521	0.296842	0.788193	0.978118	-1.02237	0.25 Gy down vs 0 Gy	6.29869e-05	0.0367943	0.826254	-1.21028	1 Gy down vs 0 Gy	58.0985	0.181449	15.0431	0.0704724	0.00936939	1
8024582	BC014970 // S1PR4 // sphingosine-1-phosphate receptor 4 // 19p13.3 // 8698 /// ENST0000	S1PR4	BC014970	5.26181e-05	0.0515301	1.10109e-06	0.000381908	0.0883786	0.648538	1.01997	1.01997	0.25 Gy up vs 0 Gy	7.34999e-05	0.0407887	0.910929	-1.09778	1 Gy down vs 0 Gy	77.0589	0.0607115	249.172	0.294468	0.00236358	1
8150550	AK298798 // CHRNA6 // cholinergic receptor, nicotinic, alpha 6 (neuronal) // 8p11.21 //	CHRNA6	AK298798	0.000166391	0.0826912	0.0437773	0.144065	0.0953007	0.65362	1.15705	1.15705	0.25 Gy up vs 0 Gy	7.24884e-05	0.0407887	2.03195	2.03195	1 Gy up vs 0 Gy	51.5437	2.33407	5.07849	0.344956	0.13585	1
7907079	BC013186 // RCSD1 // RCSD domain containing 1 // 1q24.2 // 92241 /// BC101536 // RCSD1	RCSD1	BC013186	0.000202506	0.0911195	5.21576e-05	0.0024599	0.0208594	0.534699	0.94211	-1.06145	0.25 Gy down vs 0 Gy	7.26573e-05	0.0407887	0.831701	-1.20235	1 Gy down vs 0 Gy	48.0868	0.147231	67.2342	0.308785	0.00918535	1
8011826	AK297035 // SCIMP // SLP adaptor and CSK interacting membrane protein // 17p13.2 // 388	SCIMP	AK297035	0.000180906	0.0848398	2.37491e-05	0.00170426	0.0937225	0.652452	0.908772	-1.10039	0.25 Gy down vs 0 Gy	7.81947e-05	0.0413278	0.633808	-1.57777	1 Gy down vs 0 Gy	50.0441	0.962831	88.0701	2.54166	0.057719	1
8033241	BC000725 // CD70 // CD70 molecule // 19p13 // 970 /// NM_001252 // CD70 // CD70 molecul	CD70	BC000725	0.000222837	0.0976291	0.682125	0.80297	0.000959989	0.347443	1.3667	1.3667	0.25 Gy up vs 0 Gy	7.59202e-05	0.0413278	1.64219	1.64219	1 Gy up vs 0 Gy	46.4833	1.04723	0.523124	0.0176783	0.0675876	1
8158022	ENST00000543471 // ZNF79 // zinc finger protein 79 // 9q34 // 7633 /// NM_007135 // ZNF	ZNF79	ENST00000543471	0.000242833	0.102349	0.0191847	0.0841513	0.00364328	0.449309	1.23103	1.23103	0.25 Gy up vs 0 Gy	7.77892e-05	0.0413278	1.53395	1.53395	1 Gy up vs 0 Gy	45.086	0.762192	7.42105	0.188182	0.0507159	1
8040774	AK023398 // AGBL5 // ATP/GTP binding protein-like 5 // 2p23.3 // 60509 /// AK302091 //	AGBL5	AK023398	0.000235146	0.10038	0.000655993	0.0102259	0.00051202	0.277915	1.13245	1.13245	0.25 Gy up vs 0 Gy	9.16898e-05	0.0455671	1.185	1.185	1 Gy up vs 0 Gy	45.6043	0.128604	27.622	0.116841	0.00845995	1
8015511	ENST00000565015 // DHX58 // DEXH (Asp-Glu-X-His) box polypeptide 58 // 17q21.2 // 79132	DHX58	ENST00000565015	0.000277432	0.114207	1.04145e-05	0.00115563	0.00159286	0.368315	1.10192	1.10192	0.25 Gy up vs 0 Gy	9.1678e-05	0.0455671	1.17864	1.17864	1 Gy up vs 0 Gy	42.9977	0.113682	116.635	0.462559	0.00793176	1
7964183	AF110330 // GLS2 // glutaminase 2 (liver, mitochondrial) // 12q13 // 27165 /// AF110331	GLS2	AF110330	0.000280274	0.114207	0.0169657	0.077512	0.0060169	0.453869	1.2926	1.2926	0.25 Gy up vs 0 Gy	9.07066e-05	0.0455671	1.77111	1.77111	1 Gy up vs 0 Gy	42.8417	1.36481	7.82795	0.374063	0.0955712	1
8073068	AF165520 // APOBEC3C // apolipoprotein B mRNA editing enzyme, catalytic polypeptide-lik	APOBEC3C	AF165520	0.000292754	0.114207	0.0148047	0.0709487	0.00375006	0.449757	1.23187	1.23187	0.25 Gy up vs 0 Gy	9.38589e-05	0.0459591	1.5185	1.5185	1 Gy up vs 0 Gy	42.1808	0.726369	8.29875	0.214361	0.0516611	1
7944722	AF425252 // UBASH3B // ubiquitin associated and SH3 domain containing B // 11q24.1 // 8	UBASH3B	AF425252	7.7837e-05	0.0583448	0.00128767	0.0149184	0.140839	0.69106	0.967776	-1.0333	0.25 Gy down vs 0 Gy	9.96045e-05	0.046082	1.19189	1.19189	1 Gy up vs 0 Gy	67.2629	0.2089	21.6041	0.100644	0.00931716	1
8073072	ENST00000381568 // APOBEC3D // apolipoprotein B mRNA editing enzyme, catalytic polypept	APOBEC3D	ENST00000381568	0.000295288	0.114207	0.105721	0.255178	0.0142458	0.517757	1.07661	1.07661	0.25 Gy up vs 0 Gy	0.000100254	0.046082	1.21686	1.21686	1 Gy up vs 0 Gy	42.0512	0.163648	3.18456	0.0185898	0.0116749	1
8159441	AF164795 // PHPT1 // phosphohistidine phosphatase 1 // 9q34.3 // 29085 /// AF393504 //	PHPT1	AF164795	0.000301316	0.114207	0.0307254	0.114629	0.00122082	0.351678	1.62847	1.62847	0.25 Gy up vs 0 Gy	0.000103425	0.046082	2.15473	2.15473	1 Gy up vs 0 Gy	41.7487	2.51295	6.00635	0.542304	0.180577	1
7967056	BC002638 // TRIAP1 // TP53 regulated inhibitor of apoptosis 1 // 12q24.31 // 51499 ///	TRIAP1	BC002638	0.000302389	0.114207	0.115572	0.270965	0.00198724	0.381404	1.29245	1.29245	0.25 Gy up vs 0 Gy	9.89343e-05	0.046082	1.56472	1.56472	1 Gy up vs 0 Gy	41.6957	0.840305	3.0215	0.0913396	0.0604598	1
8030351	AB082924 // RPL13A // ribosomal protein L13a // 19q13.3 // 23521 /// AK291120 // RPL13A	RPL13A	AB082924	0.000308837	0.114207	5.49059e-06	0.000862191	0.00400013	0.449934	1.02578	1.02578	0.25 Gy up vs 0 Gy	9.90648e-05	0.046082	1.05252	1.05252	1 Gy up vs 0 Gy	41.3825	0.0109078	144.914	0.0572958	0.000790755	1
8163678	AF116574 // ASTN2 // astrotactin 2 // 9q33.1 // 23245 /// BC029272 // ASTN2 // astrotac	ASTN2	AF116574	0.000319337	0.114207	0.0105853	0.0570542	0.00252994	0.403532	1.16104	1.16104	0.25 Gy up vs 0 Gy	0.000103441	0.046082	1.31168	1.31168	1 Gy up vs 0 Gy	40.8906	0.307444	9.55276	0.107737	0.0225561	1
8025053	BC104807 // TNFSF9 // tumor necrosis factor (ligand) superfamily, member 9 // 19p13.3 /	TNFSF9	BC104807	0.000322415	0.114207	0.0301475	0.113082	0.00541243	0.449934	1.20568	1.20568	0.25 Gy up vs 0 Gy	0.000103798	0.046082	1.48823	1.48823	1 Gy up vs 0 Gy	40.7505	0.6588	6.05924	0.146937	0.0485001	1
7938035	AK298934 // TRIM22 // tripartite motif containing 22 // 11p15 // 10346 /// AK301192 //	TRIM22	AK298934	0.000307437	0.114207	0.0269296	0.105243	0.00123459	0.351678	1.57696	1.57696	0.25 Gy up vs 0 Gy	0.00010565	0.0462871	2.04604	2.04604	1 Gy up vs 0 Gy	41.4497	2.18632	6.38054	0.504824	0.158239	1
7929032	AY495076 // FAS // Fas (TNF receptor superfamily, member 6) // 10q24.1 // 355 /// BC012	FAS	AY495076	0.000326858	0.114562	0.157108	0.328119	0.0087287	0.476941	1.4246	1.4246	0.25 Gy up vs 0 Gy	0.000107065	0.0462979	2.29469	2.29469	1 Gy up vs 0 Gy	40.5513	2.89277	2.49354	0.266819	0.214008	1
8004081	AK290549 // ZFP3 // zinc finger protein 3 homolog (mouse) // 17p13.2 // 124961	ZFP3	AK290549	4.55781e-05	0.0515301	2.93609e-05	0.00182735	0.0132693	0.514387	0.958508	-1.04329	0.25 Gy down vs 0 Gy	0.000114442	0.0488534	1.1143	1.1143	1 Gy up vs 0 Gy	80.9852	0.100436	81.9041	0.152363	0.00372053	1
7948511	AK299583 // VWCE // von Willebrand factor C and EGF domains // 11q12.2 // 220001 /// EN	VWCE	AK299583	0.000363459	0.121534	0.768662	0.861591	0.006391	0.453869	1.30187	1.30187	0.25 Gy up vs 0 Gy	0.00011733	0.0494522	1.76592	1.76592	1 Gy up vs 0 Gy	39.0374	1.34853	0.384056	0.0199005	0.103633	1
8089771	AK292129 // CD80 // CD80 molecule // 3q13.3-q21 // 941 /// AY197777 // CD80 // CD80 mol	CD80	AK292129	0.000366664	0.121534	0.482245	0.657252	0.0105489	0.497471	1.48895	1.48895	0.25 Gy up vs 0 Gy	0.000120861	0.0496827	2.59738	2.59738	1 Gy up vs 0 Gy	38.9146	3.82737	0.929034	0.13706	0.29506	1
8117321	BC026930 // TRIM38 // tripartite motif containing 38 // 6p21.3 // 10475 /// U90547 // T	TRIM38	BC026930	0.000369875	0.121534	0.000581263	0.00947348	0.00263393	0.408891	1.10948	1.10948	0.25 Gy up vs 0 Gy	0.000120499	0.0496827	1.20348	1.20348	1 Gy up vs 0 Gy	38.7929	0.143514	28.8516	0.160105	0.0110985	1

## Sheet: Iron fdr 0.05 FC 2
Transcript ID	gene_assignment	Gene Symbol	RefSeq	p-value(Dose)	FDR-corrected (p-value(Dose))	p-value(Donor)	FDR-corrected (p-value(Donor))	p-value(0.25 Gy vs. 0 Gy)	FDR-corrected (p-value(0.25 Gy vs. 0 Gy))	Ratio(0.25 Gy vs. 0 Gy)	Fold-Change(0.25 Gy vs. 0 Gy)	Fold-Change(0.25 Gy vs. 0 Gy) (Description)	p-value(1 Gy vs. 0 Gy)	FDR-corrected (p-value(1 Gy vs. 0 Gy))	Ratio(1 Gy vs. 0 Gy)	Fold-Change(1 Gy vs. 0 Gy)	Fold-Change(1 Gy vs. 0 Gy) (Description)	F-statistic(Dose)	Sum of squares (Dose)	F-statistic (Donor)	Sum of squares (Donor)	Sum of squares (Error)	F-statistic (Error)
8173299	AF298812 // EDA2R // ectodysplasin A2 receptor // Xq12 // 60401 /// AK296264 // EDA2R /	EDA2R	AF298812	8.7955e-08	1.67115e-06	0.0820959	0.155982	5.29299e-07	1.00567e-05	2.41187	2.41187	0.25 Gy up vs 0 Gy	2.89885e-08	5.50782e-07	4.19258	4.19258	1 Gy up vs 0 Gy	671.581	8.70072	3.67366	0.0713917	0.0388667	1
7934906	AK300664 // ACTA2 // actin, alpha 2, smooth muscle, aorta // 10q23.3 // 59 /// AY692464	ACTA2	AK300664	5.27579e-07	5.012e-06	1.29299e-06	2.45668e-05	2.3852e-06	2.26594e-05	1.72218	1.72218	0.25 Gy up vs 0 Gy	1.79921e-07	1.70925e-06	2.3175	2.3175	1 Gy up vs 0 Gy	368.272	3.0251	236.062	2.90863	0.0246429	1
8085486	ENST00000285021 // XPC // xeroderma pigmentosum, complementation group C // 3p25 // 750	XPC	ENST00000285021	9.76747e-07	6.18606e-06	0.00155093	0.0147338	4.08285e-06	2.5858e-05	1.6047	1.6047	0.25 Gy up vs 0 Gy	3.36863e-07	2.13347e-06	2.05654	2.05654	1 Gy up vs 0 Gy	299.362	2.23426	20.1686	0.225789	0.0223902	1
7939738	AB107037 // DDB2 // damage-specific DNA binding protein 2, 48kDa // 11p12-p11 // 1643 /	DDB2	AB107037	2.13137e-06	1.0124e-05	0.00859589	0.0408305	7.81389e-06	3.7116e-05	2.2087	2.2087	0.25 Gy up vs 0 Gy	7.50653e-07	3.5656e-06	3.25171	3.25171	1 Gy up vs 0 Gy	230.114	6.01645	10.4041	0.40803	0.0784366	1
8149733	AF012535 // TNFRSF10B // tumor necrosis factor receptor superfamily, member 10b // 8p22	TNFRSF10B	AF012535	5.44733e-06	1.89836e-05	0.0962184	0.166195	2.38418e-05	7.5499e-05	1.9607	1.9607	0.25 Gy up vs 0 Gy	1.86314e-06	6.71378e-06	2.83204	2.83204	1 Gy up vs 0 Gy	167.501	4.64065	3.36207	0.13972	0.0831158	1
7985767	AK022624 // AEN // apoptosis enhancing nuclease // 15q26.1 // 64782 /// BC005164 // AEN	AEN	AK022624	5.99483e-06	1.89836e-05	0.0285596	0.0833975	2.13111e-05	7.5499e-05	2.03085	2.03085	0.25 Gy up vs 0 Gy	2.12014e-06	6.71378e-06	2.86061	2.86061	1 Gy up vs 0 Gy	162.144	4.78422	6.21176	0.274927	0.088518	1
7956989	AF092845 // MDM2 // Mdm2, p53 E3 ubiquitin protein ligase homolog (mouse) // 12q14.3-q1	MDM2	AF092845	1.36484e-05	3.70457e-05	0.357133	0.424095	0.000136294	0.000369941	1.65786	1.65786	0.25 Gy up vs 0 Gy	4.3462e-06	1.17968e-05	2.5071	2.5071	1 Gy up vs 0 Gy	122.534	3.5284	1.30198	0.0562365	0.0863859	1
8119858	AB024313 // POLH // polymerase (DNA directed), eta // 6p21.1 // 5429 /// AF158185 // PO	POLH	AB024313	2.71654e-05	5.95756e-05	0.117977	0.186797	0.000291645	0.000574338	1.66502	1.66502	0.25 Gy up vs 0 Gy	8.6382e-06	1.8947e-05	2.57412	2.57412	1 Gy up vs 0 Gy	96.7966	3.72906	2.98446	0.172463	0.115574	1
8064844	BC000491 // PCNA // proliferating cell nuclear antigen // 20pter-p12 // 5111 /// BC0624	PCNA	BC000491	2.822e-05	5.95756e-05	0.042138	0.0924187	0.000302283	0.000574338	1.84187	1.84187	0.25 Gy up vs 0 Gy	8.97488e-06	1.8947e-05	3.10398	3.10398	1 Gy up vs 0 Gy	95.5377	5.35164	5.17341	0.43469	0.168048	1
8018236	AK298908 // FDXR // ferredoxin reductase // 17q24-q25 // 2232 /// AK301779 // FDXR // f	FDXR	AK298908	5.95521e-05	0.000113149	0.133079	0.1945	0.000453118	0.000782658	1.78903	1.78903	0.25 Gy up vs 0 Gy	1.92576e-05	3.65894e-05	2.77034	2.77034	1 Gy up vs 0 Gy	73.8226	4.3511	2.7726	0.245126	0.17682	1
7989493	BC003667 // RPS27L // ribosomal protein S27-like // 15q22.2 // 51065 /// ENST0000033096	RPS27L	BC003667	7.28866e-05	0.000125895	0.194685	0.246601	0.000270915	0.000574338	1.67776	1.67776	0.25 Gy up vs 0 Gy	2.54444e-05	4.39494e-05	2.19501	2.19501	1 Gy up vs 0 Gy	68.8189	2.65879	2.15371	0.124812	0.115904	1
7953211	AY425618 // C12orf5 // chromosome 12 open reading frame 5 // 12p13.3 // 57103	C12orf5	AY425618	0.000109825	0.00017389	0.425912	0.476019	0.00248035	0.00294542	1.39085	1.39085	0.25 Gy up vs 0 Gy	3.51997e-05	5.57329e-05	2.05739	2.05739	1 Gy up vs 0 Gy	59.6451	2.17186	1.08012	0.0589957	0.109239	1
7922343	AK297932 // TNFSF4 // tumor necrosis factor (ligand) superfamily, member 4 // 1q25 // 7	TNFSF4	AK297932	0.000145294	0.000212353	0.585161	0.585161	0.00184296	0.00233442	1.91209	1.91209	0.25 Gy up vs 0 Gy	4.6343e-05	6.77321e-05	3.57328	3.57328	1 Gy up vs 0 Gy	54.0653	6.7517	0.700682	0.131252	0.374641	1
8163629	BC093630 // TNFSF8 // tumor necrosis factor (ligand) superfamily, member 8 // 9q33 // 9	TNFSF8	BC093630	0.000174411	0.000220921	0.00271221	0.0171773	0.00176366	0.00233442	1.66347	1.66347	0.25 Gy up vs 0 Gy	5.58828e-05	7.58409e-05	2.60977	2.60977	1 Gy up vs 0 Gy	50.6945	3.83525	16.3537	1.85584	0.226963	1
8150550	AK298798 // CHRNA6 // cholinergic receptor, nicotinic, alpha 6 (neuronal) // 8p11.21 //	CHRNA6	AK298798	0.000166391	0.000220921	0.0437773	0.0924187	0.0953007	0.0953007	1.15705	1.15705	0.25 Gy up vs 0 Gy	7.24884e-05	9.18186e-05	2.03195	2.03195	1 Gy up vs 0 Gy	51.5437	2.33407	5.07849	0.344956	0.13585	1
7938035	AK298934 // TRIM22 // tripartite motif containing 22 // 11p15 // 10346 /// AK301192 //	TRIM22	AK298934	0.000307437	0.000343606	0.0269296	0.0833975	0.00123459	0.0018044	1.57696	1.57696	0.25 Gy up vs 0 Gy	0.00010565	0.000113013	2.04604	2.04604	1 Gy up vs 0 Gy	41.4497	2.18632	6.38054	0.504824	0.158239	1
8159441	AF164795 // PHPT1 // phosphohistidine phosphatase 1 // 9q34.3 // 29085 /// AF393504 //	PHPT1	AF164795	0.000301316	0.000343606	0.0307254	0.0833975	0.00122082	0.0018044	1.62847	1.62847	0.25 Gy up vs 0 Gy	0.000103425	0.000113013	2.15473	2.15473	1 Gy up vs 0 Gy	41.7487	2.51295	6.00635	0.542304	0.180577	1
7929032	AY495076 // FAS // Fas (TNF receptor superfamily, member 6) // 10q24.1 // 355 /// BC012	FAS	AY495076	0.000326858	0.000345017	0.157108	0.213218	0.0087287	0.00975561	1.4246	1.4246	0.25 Gy up vs 0 Gy	0.000107065	0.000113013	2.29469	2.29469	1 Gy up vs 0 Gy	40.5513	2.89277	2.49354	0.266819	0.214008	1
8089771	AK292129 // CD80 // CD80 molecule // 3q13.3-q21 // 941 /// AY197777 // CD80 // CD80 mol	CD80	AK292129	0.000366664	0.000366664	0.482245	0.509036	0.0105489	0.0111349	1.48895	1.48895	0.25 Gy up vs 0 Gy	0.000120861	0.000120861	2.59738	2.59738	1 Gy up vs 0 Gy	38.9146	3.82737	0.929034	0.13706	0.29506	1

## Sheet: Iron only
List of genes differentially expressed in response to iron ion irradiation only
ISG20
RBM14
SEMA7A
NADSYN1
APOBEC3F
PALB2
PLK2
SUN2
PRKCB
CHAF1B
AFF3
TRIM32
SESN2
KCTD11
DDB1
BCL2L1
MOSPD1
PRKCE
S1PR4
CHRNA6
RCSD1
SCIMP
AGBL5
DHX58
UBASH3B
APOBEC3D
RPL13A
TNFSF9
ZFP3
CD80
TRIM38
